# Supplementary material for: Deciphering the Autoantibody Response to the OJ Antigenic Complex
Source: MDPI journal article supplement (doi:10.3390/diagnostics13010156), 2023-01-03

# Supplementary Materials

**Supplemental Table S1: Cohort of anti-OJ positive samples (n=39) detected by line immunoassay (LIA)\***

| Sample No. | Sample ID | cN-1A | Ro52 | OJ | EJ | PL-12 | PL-7 | SRP | Jo-1 | PM75 | PM100 | Ku | SAE1 | NXP2 | MDA5 | TIF1 $\gamma$ | Mi-2 $\beta$ | Mi-2 $\alpha$ |
|------------|-----------|-------|------|----|----|-------|------|-----|------|------|-------|----|------|------|------|---------------|--------------|---------------|
| 1          | X294      |       |      | 14 |    |       |      | 11  |      |      |       |    |      |      |      |               |              |               |
| 2          | X343      |       | 48   | 65 |    |       |      |     |      |      | 13    |    |      |      |      |               |              |               |
| 3          | X271      |       |      | 15 |    |       |      |     |      |      |       |    |      |      |      |               |              |               |
| 4          | X379      |       |      | 11 |    |       |      |     |      |      |       |    |      |      |      |               |              |               |
| 5          | X709      |       |      | 42 |    |       |      |     |      |      |       |    |      |      |      | 90            |              |               |
| 6          | X410      |       |      | 13 |    |       |      |     |      |      |       |    |      |      |      |               |              |               |
| 7          | X299      |       |      | 18 |    | 11    |      |     |      |      |       |    |      |      |      |               |              |               |
| 8          | X446      |       |      | 25 |    |       |      |     |      |      |       |    |      |      |      |               |              |               |
| 9          | X794      |       |      | 23 |    |       |      |     |      |      |       |    |      |      |      |               |              |               |
| 10         | X566      |       | 21   | 12 |    |       |      |     |      | 15   |       |    |      |      |      | 14            |              |               |
| 11         | X856      |       |      | 11 |    |       |      |     |      |      |       |    |      |      |      |               |              |               |
| 12         | X331      |       |      | 48 |    |       |      |     |      |      |       |    |      |      |      |               |              |               |
| 13         | X669      |       |      | 14 |    |       |      |     |      |      |       | 17 |      |      |      |               |              |               |
| 14         | X286      |       |      | 32 |    |       |      |     |      |      |       |    |      |      |      |               |              |               |
| 15         | X648      |       |      | 37 |    |       |      |     |      |      |       |    |      |      |      |               |              |               |
| 16         | X627      |       |      | 20 |    |       |      |     |      |      |       |    |      |      |      |               |              |               |
| 17         | X391      | 48    |      | 13 |    |       | 34   |     |      |      |       | 25 |      |      |      |               |              |               |
| 18         | X370      |       |      | 11 |    |       |      |     |      |      |       |    |      |      |      |               |              |               |
| 19         | X325      |       |      | 12 |    |       |      |     |      | 15   |       |    |      |      |      |               |              |               |
| 20         | X870      |       |      | 15 |    |       |      |     |      |      |       |    |      |      |      |               |              |               |
| 21         | X967      |       |      | 16 |    |       |      |     |      |      |       |    |      |      |      |               |              |               |
| 22         | X873      |       |      | 13 |    |       |      |     |      |      |       |    |      |      |      |               |              |               |
| 23         | X044      |       |      | 51 |    |       |      |     |      |      |       |    |      |      |      |               |              |               |
| 24         | X393      |       |      | 29 |    |       |      |     |      |      |       | 10 |      |      |      |               |              |               |
| 25         | X657      |       |      | 86 |    |       |      |     |      |      |       |    |      |      |      |               |              |               |
| 26         | X141      |       |      | 18 |    |       |      |     |      |      |       |    |      |      |      |               |              |               |
| 27         | A382      |       |      | 12 |    |       |      |     |      |      |       |    |      |      |      |               |              |               |
| 28         | X003      |       |      | 17 |    |       |      |     |      |      |       |    |      |      |      |               |              |               |
| 29         | X671      |       |      | 26 |    |       |      | 23  |      |      |       |    |      |      |      |               |              |               |
| 30         | X757      |       | 82   | 18 |    |       |      |     |      |      |       | 10 |      | 110  |      |               |              |               |
| 31         | X291      |       |      | 11 |    |       |      |     |      |      |       | 11 |      |      |      |               |              |               |
| 32         | X063      |       |      | 16 |    |       |      |     |      |      |       |    |      |      |      |               |              |               |
| 33         | X029      | 45    |      | 12 |    |       |      |     |      |      |       |    |      |      |      |               |              |               |
| 34         | X556      |       |      | 30 |    |       |      |     |      |      |       |    |      |      |      |               |              |               |
| 35         | X077      |       |      | 18 |    |       |      |     |      |      |       |    |      |      |      |               |              |               |
| 36         | X007      |       |      | 11 |    |       |      |     |      |      |       |    |      |      |      |               |              |               |
| 37         | X061      |       |      | 11 |    |       |      |     |      |      |       |    |      |      |      |               |              |               |
| 38         | X001      |       |      | 43 |    |       |      |     |      |      |       |    |      |      |      |               |              |               |
| 39         | X002      |       |      | 15 |    |       |      |     |      |      |       |    |      |      |      |               |              |               |

\* **LIA:** Results obtained from Euroimmun Myositis Profile 3 with EUROBlot Master 44, EUROLIne Scanner and software expressed as density units. Reference range 0-10 density units.

**Supplemental Figure S1. Amino acid sequence alignment of human KARS and IARS proteins**

|                      |                                                               |      |
|----------------------|---------------------------------------------------------------|------|
| sp Q15046 SYK_HUMAN  | -----                                                         | 0    |
| sp P41252 SYIC_HUMAN | MLQQVPENINFPAAEEKILEFWTEFNCFQCECLKQSKHKPKFTFYDGPFFATGLPHYGHIL | 60   |
| sp Q15046 SYK_HUMAN  | -----                                                         | 0    |
| sp P41252 SYIC_HUMAN | AGTIKDIVTRYAHQSGFHVDRRFQWDCGLPVEYEIDKTLGIRGPEVAKMGITEYNNQC    | 120  |
| sp Q15046 SYK_HUMAN  | -----                                                         | 0    |
| sp P41252 SYIC_HUMAN | RAIVMRYSAEWKSTVSRLGRWIDFDNDYKTLYPQFMESVWWVFKQLYDKGLVYRGVKVMP  | 180  |
| sp Q15046 SYK_HUMAN  | -----                                                         | 0    |
| sp P41252 SYIC_HUMAN | FSTACNTPLSNFESHQNYKDVQDPSVFVTFPLEEDETIVSLVAWTTTPWTLPNLAVCVNP  | 240  |
| sp Q15046 SYK_HUMAN  | -----                                                         | 0    |
| sp P41252 SYIC_HUMAN | EMQYVKIKDVARGRLILMEARLSALYKLESDEILERFPGAYLKGKKYRPLFDYFLCK     | 300  |
| sp Q15046 SYK_HUMAN  | -----                                                         | 0    |
| sp P41252 SYIC_HUMAN | ENGAFIVLVNDYVKEEGTGVVHQAPYFGAEDYRCMDFNIIKRDLSLPCVVDASGCFIT    | 360  |
| sp Q15046 SYK_HUMAN  | -----MAAYQAAEVKVD                                             | 12   |
| sp P41252 SYIC_HUMAN | EVTDFAGQYVKDADKSIIRTLKEQGRLVATFTFHSYPFCWRSPTLIYKAVPSWFVRVE    | 420  |
| sp Q15046 SYK_HUMAN  | GSEPRLS-KNEL-----KRRLLAEK-----K-V                             | 33   |
| sp P41252 SYIC_HUMAN | NMVDQLLRNNDLCYVWPVLVREKRFGNMQRDARDWTISRNYWGTPILWVSDDFEFVVC    | 480  |
| sp Q15046 SYK_HUMAN  | AEKEAKQKELSEKQLSQATAAATNHT---TDNSVGPPEESVD-PNQQYKIRSQAIHCL--  | 87   |
| sp P41252 SYIC_HUMAN | IGSVAELEELSGAKTSDLRHRESVDHLTIPSRCEKSSLHRISEVFTDWFESGSMFYAVHY  | 540  |
| sp Q15046 SYK_HUMAN  | ----LVNCGEPYTHKHVDISLTDIFIQYSHLQPEDHLIDITLKVAGRIHAKRASGGKLI   | 143  |
| sp P41252 SYIC_HUMAN | PFENRREFEAPFADDAIA-----EGIDQTRGWEYLLVL--ATA-----LFGQPP        | 583  |
| sp Q15046 SYK_HUMAN  | SYDLRGEVVKIQ----VMANSRNYKSEEEETHINNLRRGDIIGVQGNPGKTKKCELSI    | 198  |
| sp P41252 SYIC_HUMAN | EKNVIVNELVVASDGQKMSKRKKNPDPVSIHQ---K-----YSADAL               | 623  |
| sp Q15046 SYK_HUMAN  | IPYETLLSLCLHMLPHHGLKDKETRYRQRYLLIINDFVROKRIIRSKI-----         | 250  |
| sp P41252 SYIC_HUMAN | RLVIL--NSGVV-RAENLR-----KEGVRVQLKQVLPWYNAYRDLQNVLRLOKEEEI     | 676  |
| sp Q15046 SYK_HUMAN  | -----ITYIRSFIL-DELSFRIETPMNNII---E-----                       | 275  |
| sp P41252 SYIC_HUMAN | EFLYNENTVRESNITDRWILSDMQSLIEFEETEMAAAYRLYTVMRLVKFVDILTNNWVR   | 736  |
| sp Q15046 SYK_HUMAN  | -----CGAVAKFEITYHNEID-----                                    | 291  |
| sp P41252 SYIC_HUMAN | MNRRRLKGENGMEDCVMALETLSVLLSLCLMAFYTPFELTELMYQNLKVLIDPVSVDK    | 796  |
| sp Q15046 SYK_HUMAN  | ---MN---LYMRAPSLYHK--MLVGGIDRVYELIQRQRNEG-----                | 326  |
| sp P41252 SYIC_HUMAN | DTLSIHVLMPLRVREELIDKTESAVSQMSVIELGRVIRDRKTIPIKYPLKEIVVIHQD    | 856  |
| sp Q15046 SYK_HUMAN  | -----IDITHNFEFTTCFYMAYADYHDLFEI                               | 353  |
| sp P41252 SYIC_HUMAN | PEALKDIKSLEKYIEELNVRKVTLSIDKNKYGRIRAEEDHMLVGLKRL-KGAFKAVTTS   | 915  |
| sp Q15046 SYK_HUMAN  | TEKM-----VSCMVKIIITGSYKYTYHDPGEQAYDVDFTPPFRIRINMVE            | 398  |
| sp P41252 SYIC_HUMAN | IKQLSSEELQFQKTGTIVVEGHELD-DEDIRLMYTFQATGTGAQFEAHSDAQALVL--    | 972  |
| sp Q15046 SYK_HUMAN  | ELEKALGMKLEETNLEETEETRKILDDICVAKAVEG---PPRTTARLLDKLVGEFEVT    | 455  |
| sp P41252 SYIC_HUMAN | -----LDVTEQDSMVDEGMAREVINRQKLR-KKQNLVETDEIVVYKAKSESTYLSV      | 1025 |
| sp Q15046 SYK_HUMAN  | CI-NPTFICDHPQIMSPAKWHRSKEGLTERFELEFVMKKEICNAYTESNDPMRQRIIFEE  | 514  |
| sp P41252 SYIC_HUMAN | IESHTETIF--TTIKAPIKPYVPSPSDK-----VLIOEKQOLK----GSELEIT        | 1068 |
| sp Q15046 SYK_HUMAN  | QAKAKAGDDEAMFIDENFCIALE-----YGLPPTAGWGMGIDR                   | 553  |
| sp P41252 SYIC_HUMAN | LTRGSSSLPGPACAYVNLNLCANGSEQGVLLLENPKGDNRLDLLKLSVVTSIFVKNTE    | 1128 |
| sp Q15046 SYK_HUMAN  | VAMGLTDSNNI--KEVILFP-----AMKPEDK--                            | 578  |
| sp P41252 SYIC_HUMAN | LAVFIDEETIQNQTDLSLSGKTLCVTAGSAPSLINSSSTLLCQYINLQLLNAKQOECLM   | 1188 |
| sp Q15046 SYK_HUMAN  | -----KENVATDTTLE                                              | 589  |
| sp P41252 SYIC_HUMAN | GTVGTLLLENPLGQNLTHQGLLYEAAKVFGRLSRKRLKFLNETQTQEITEDI-PVKTLN   | 1247 |
| sp Q15046 SYK_HUMAN  | STTVGTSV-----                                                 | 597  |
| sp P41252 SYIC_HUMAN | MRTVYVSULPTTADF                                               | 1262 |

Legend: Multiple alignment was carried out by Clustal Omega (RRID:SCR\_001591). Red background with white letters shows strictly conserved residues; yellow background indicates conservative substitutions; grey background shows semi-conservative substitutions. Gaps are indicated as dashes. Percent identity and similarity of human KARS to IARS are 8.61% and 15.73% respectively.

**Supplement Figure S2: Correlations of HEp-2 IIF Staining Patterns with Levels of Anti-IARS and Anti-KARS Autoantibodies Measured by PMAT**

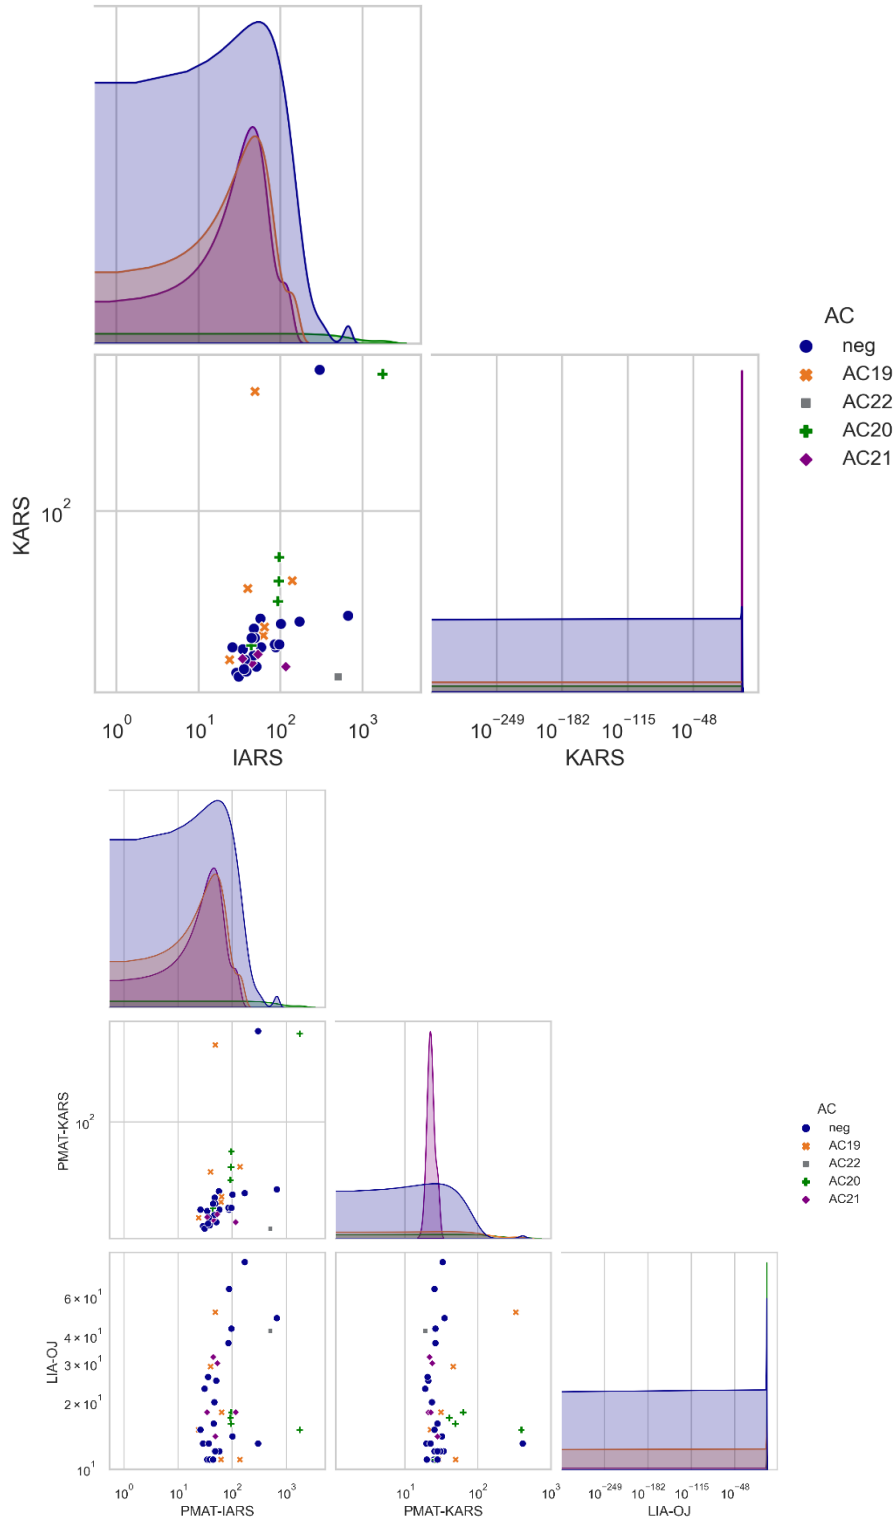

Supplement: s1 [file s1]
